# Supplementary material for: Vocal state change through laryngeal development
Source: PubMed Central journal article supplement (PMC6785551; doi:10.1038/s41467-019-12588-6), 2019-10-09
Supplement: 41467_2019_12588_MOESM1_ESM.pdf [file 41467_2019_12588_MOESM1_ESM.pdf]

1 **Supplementary Information**

2

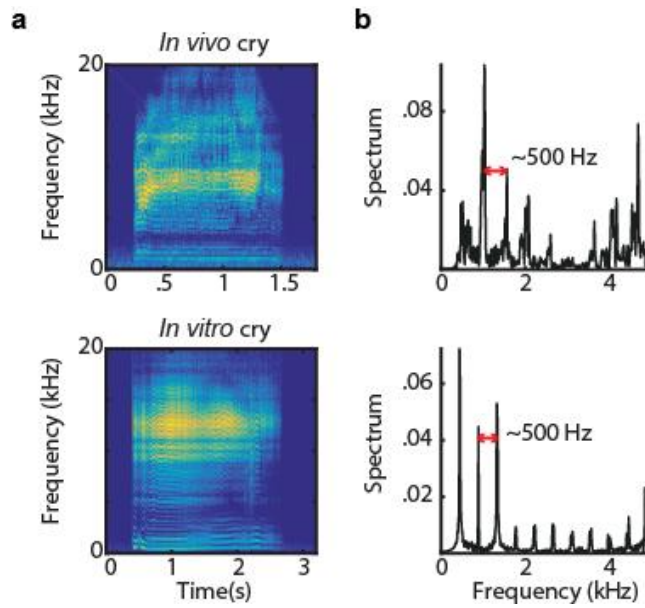

3

4

5 **Supplementary Figure 1 | Comparison between *in vivo* cry and *in vitro* cry.** a, Spectrograms of a marmoset infant  
6 cry (top) and cry-like sound generated from unstretched infant larynx (bottom). b, Spectra of the *in vivo* cry (top) and *in*  
7 *vitro* cry (bottom). Both sounds are featured by a harmonic stack with ~500 Hz  $f_0$ .

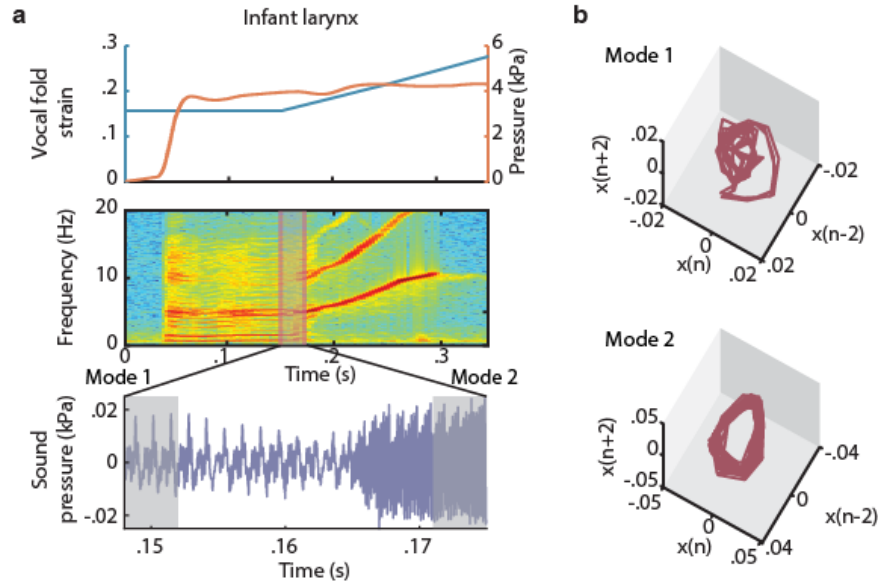

8  
9

10 **Supplementary Figure 2 | Two distinct vibratory modes during increasing vocal fold length.** **a**, Zoom-in view of  
 11 acoustic signal in Figure 2D around the transition from low strain to high strain. **b**, Phase portraits of the two vibratory  
 12 modes.

13
